# Supplementary material for: The C2N surface as a highly selective sensor for the detection of nitrogen iodide from a mixture of NX3 (X = Cl, Br, I) explosives
Source: Royal Society of Chemistry journal article supplement (doi:10.1039/d0ra04930a), 2020-01-01
Supplement: d0ra04930a1.pdf [file d0ra04930a1.pdf]

### Supporting Information

## **C<sub>2</sub>N surface as high selective sensor for the detection of nitrogen iodide from a mixture of NX<sub>3</sub> (X= Cl, Br, I) explosives**

*Muhammad Yar<sup>a</sup>, Muhammad Ali Hashmi<sup>b</sup> and Khurshid Ayub<sup>a,\*</sup>*

<sup>a</sup>Department of Chemistry, COMSATS University, Abbottabad Campus, KPK, Pakistan 22060

<sup>b</sup>Department of Chemistry, University of Education, Attock Campus, Attock, Punjab, Pakistan  
43600

\*Corresponding author. Tel: +92-992-383591. E-mail: [khurshid@cuiatd.edu.pk](mailto:khurshid@cuiatd.edu.pk) (Khurshid Ayub)

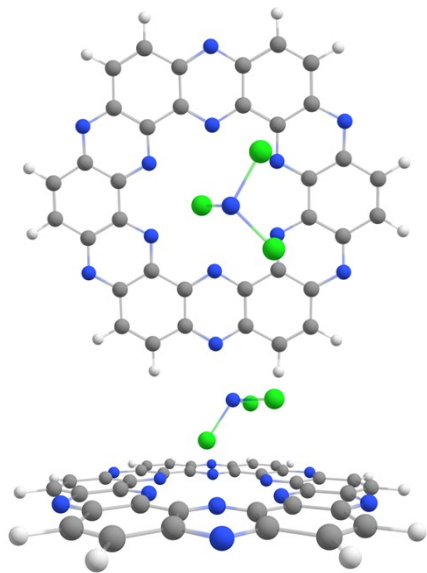

**A**

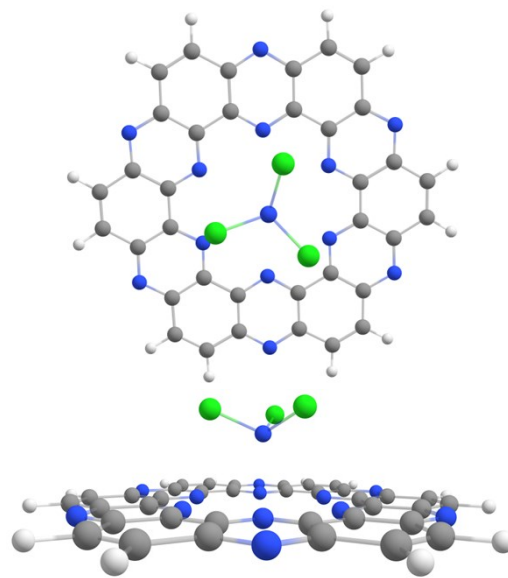

**B**

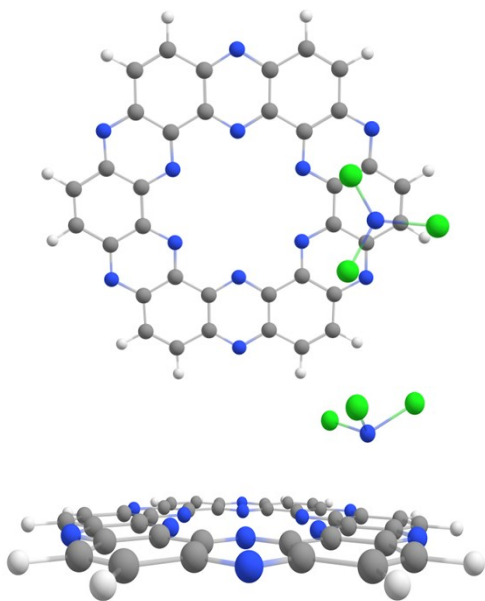

**C**

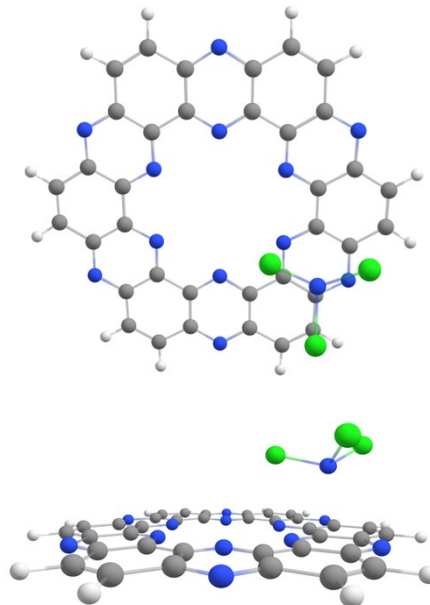

**D**

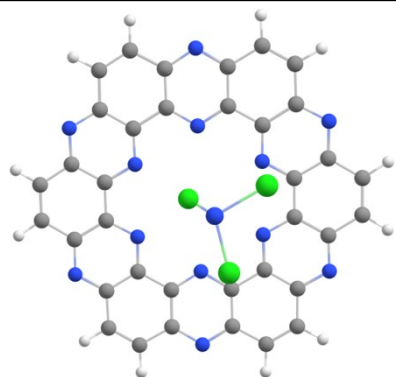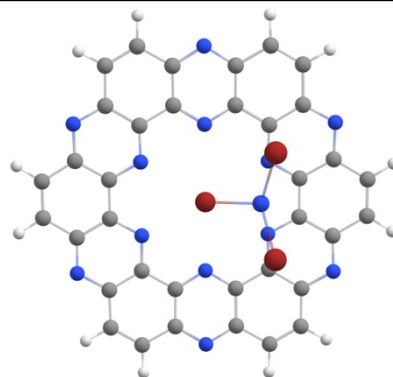

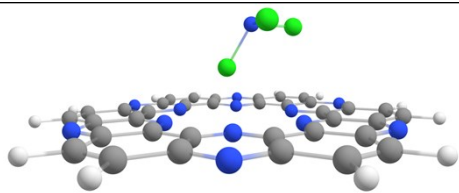

**E**

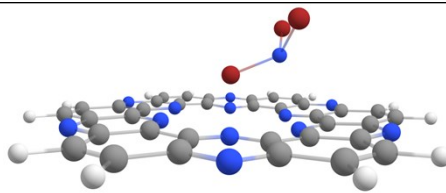

**F**

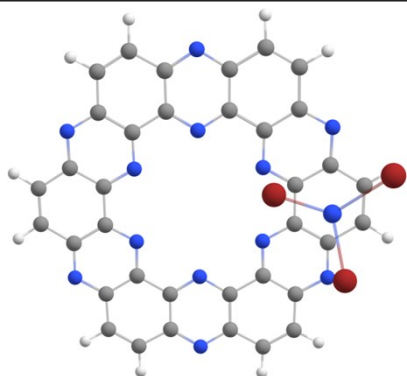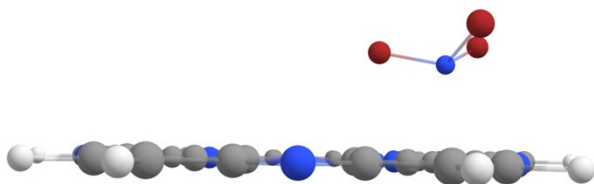

**G**

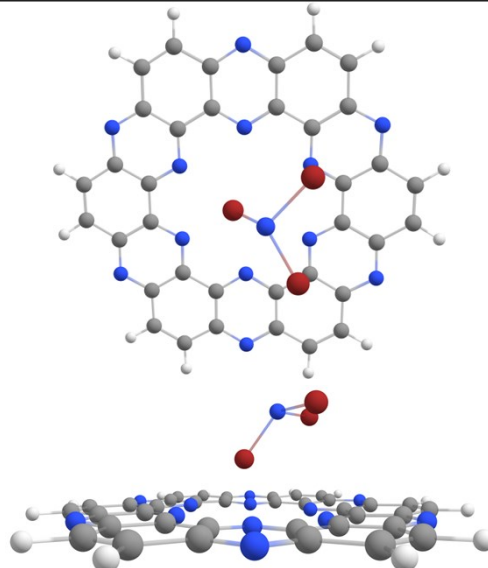

**H**

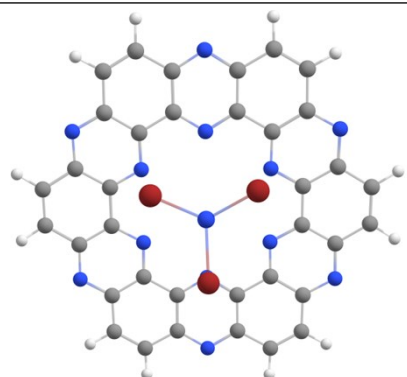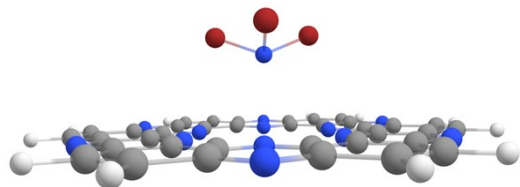

**I**

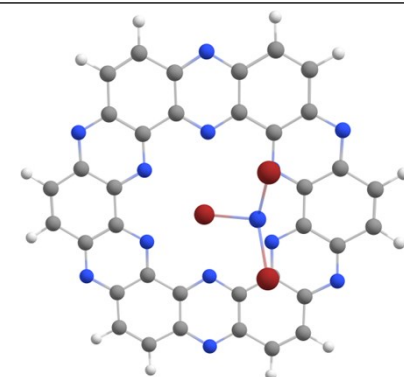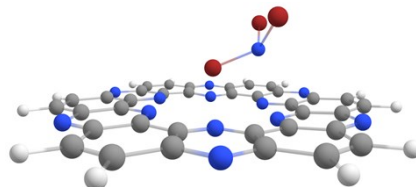

**J**

---

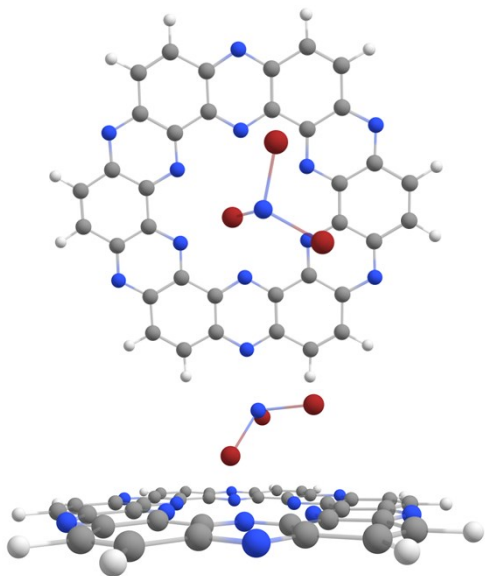

**K**

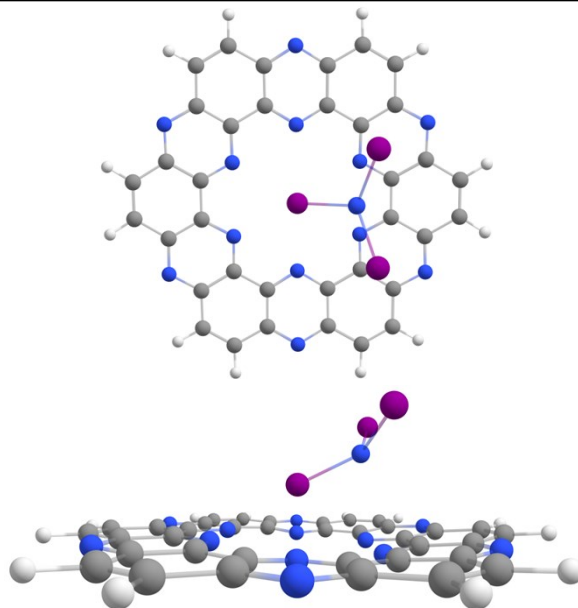

**L**

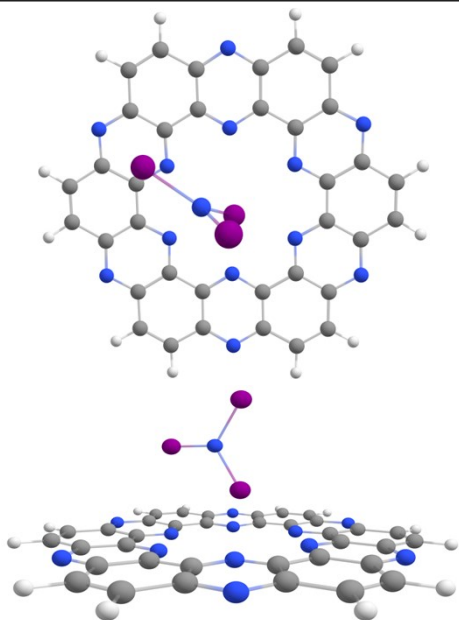

**M**

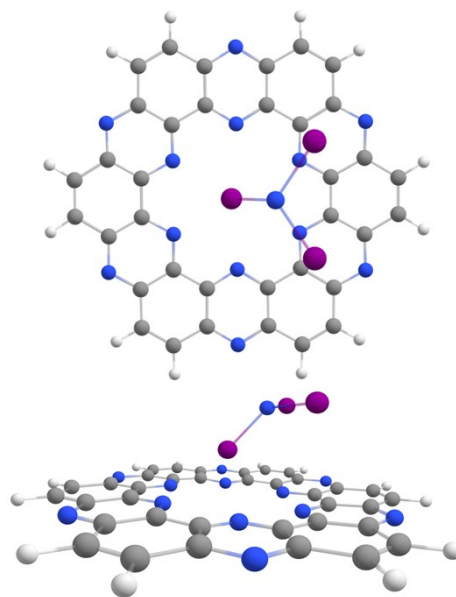

**N**

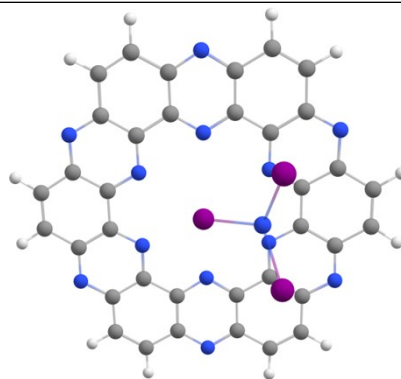

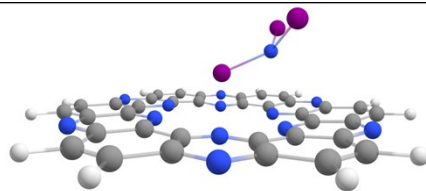

O

**Figure S1.** Optimized geometries of possible orientation of each analyte over C<sub>2</sub>N surface at M05-2X (A-E = NCl<sub>3</sub>@C<sub>2</sub>N, F-J = NBr<sub>3</sub>@C<sub>2</sub>N and K-O = NI<sub>3</sub>@C<sub>2</sub>N complexes)

**Table S 2.** The values of topological parameters of BCPs obtained through QTAIM analysis

| Analytes@C <sub>2</sub> N             | Aanalyte---C <sub>2</sub> N | $\rho$ | $\nabla^2\rho$ | G (r)   | V (r)   | H (r)  | V(r)/G(r) | E <sub>int</sub><br>(kcal/mole) |
|---------------------------------------|-----------------------------|--------|----------------|---------|---------|--------|-----------|---------------------------------|
| <u>NCl<sub>3</sub>@C<sub>2</sub>N</u> | N1 - Cl9                    | 0.005  | 0.016          | 0.0033  | -0.0025 | 0.0007 | -0.78     | -0.79                           |
|                                       | N2 - Cl9                    | 0.006  | 0.02           | 0.0041  | -0.0032 | 0.0009 | -0.79     | -10                             |
|                                       | N2 - Cl10                   | 0.006  | 0.019          | 0.004   | -0.0031 | 0.0008 | -0.79     | -0.99                           |
|                                       | N3 - Cl9                    | 0.009  | 0.033          | 0.0068  | -0.0053 | 0.0015 | -0.78     | -1.65                           |
|                                       | N4 - Cl9                    | 0.011  | 0.046          | 0.0091  | -0.0067 | 0.0023 | -0.74     | -2.11                           |
|                                       | N5 - Cl9                    | 0.009  | 0.033          | 0.0067  | -0.0052 | 0.0016 | -0.77     | -1.63                           |
|                                       | N6 - Cl9                    | 0.006  | 0.02           | 0.0041  | -0.0032 | 0.0009 | -0.78     | -1.01                           |
|                                       | C7 - Cl11                   | 0.005  | 0.018          | 0.0037  | -0.003  | 0.0007 | -0.8      | -0.93                           |
| C8 - Cl11                             | 0.005                       | 0.017  | 0.0036         | -0.0029 | 0.0007  | -0.79  | -0.9      |                                 |
| <u>NBr<sub>3</sub>@C<sub>2</sub>N</u> | N1 - Br8                    | 0.006  | 0.019          | 0.0037  | -0.0028 | 0.0009 | -0.75     | -0.87                           |
|                                       | C2 - Br9                    | 0.006  | 0.016          | 0.0034  | -0.0027 | 0.0007 | -0.8      | -0.85                           |
|                                       | N3 - Br8                    | 0.007  | 0.024          | 0.0048  | -0.0036 | 0.0012 | -0.75     | -1.12                           |
|                                       | N4 - Br8                    | 0.006  | 0.02           | 0.004   | -0.003  | 0.001  | -0.76     | -0.95                           |
|                                       | N5 - Br8                    | 0.013  | 0.051          | 0.0104  | -0.0081 | 0.0023 | -0.78     | -2.55                           |
|                                       | N6 - Br8                    | 0.011  | 0.039          | 0.0078  | -0.006  | 0.0018 | -0.76     | -1.88                           |
|                                       | N7 - Br8                    | 0.007  | 0.023          | 0.0046  | -0.0035 | 0.0011 | -0.75     | -1.1                            |
| N7 - Br10                             | 0.006                       | 0.017  | 0.0035         | -0.0027 | 0.0008  | -0.76  | -0.84     |                                 |
| <u>NI<sub>3</sub>@C<sub>2</sub>N</u>  | N1 - I9                     | 0.007  | 0.02           | 0.004   | -0.003  | 0.0011 | -0.74     | -0.93                           |
|                                       | N2 - I9                     | 0.008  | 0.026          | 0.0051  | -0.0038 | 0.0013 | -0.75     | -1.21                           |
|                                       | N2 - I10                    | 0.013  | 0.043          | 0.0089  | -0.0071 | 0.0018 | -0.8      | -2.23                           |
|                                       | N3 - I9                     | 0.012  | 0.009          | 0.0087  | -0.0069 | 0.0018 | -0.79     | -2.18                           |
|                                       | N4 - I9                     | 0.016  | 0.057          | 0.0121  | -0.0102 | 0.0019 | -0.84     | -3.19                           |
|                                       | N5 - I9                     | 0.008  | 0.026          | 0.0052  | -0.0039 | 0.0013 | -0.75     | -1.23                           |
|                                       | C7 - I11                    | 0.005  | 0.012          | 0.0024  | -0.0018 | 0.0005 | -0.77     | -0.57                           |
|                                       | C8 - I11                    | 0.005  | 0.013          | 0.0025  | -0.0019 | 0.0006 | -0.75     | -0.59                           |

We used M06-2X and  $\omega$ -B97XD along with M05-2X to check the trend in interaction energy and electronic properties. The trends of interaction energies and electronic properties predicted by M06-2X/LANL2DZ and  $\omega$ -B97X/LANL2DZ are similar to those at M05-2X/LANL2DZ for complexes of  $NX_3@C_2N$ . Therefore, we feel confident that the results obtained are not dependent on the level of theory.

Interaction energies (kcal/mol) of  $NX_3@C_2N$  complexes at different methods using LANL2DZ basis set are:

| Bond length (Å) | M05-2X | M06-2X | $\omega$ -B97XD |
|-----------------|--------|--------|-----------------|
| $NCl_3@C_2N$    | -10.85 | -11.83 | -13.67          |
| $NBr_3@C_2N$    | -13.78 | -17.21 | -17.04          |
| $NI_3@C_2N$     | -16.33 | -20.56 | -20.10          |

The results of energies of HOMO-LUMO gap ( $E_{H-L}$  gap) of analytes@ $C_2N$  surface at different methods

| Methods      | M05-2X    | M06-2X    | $\omega$ -B97XD    |
|--------------|-----------|-----------|--------------------|
| Analytes     | HOMO (eV) | LUMO (eV) | $E_{H-L}$ gap (eV) |
| $C_2N$       | 5.71      | 5.60      | 7.05               |
| $NCl_3@C_2N$ | 5.58      | 5.32      | 6.58               |
| $NBr_3@C_2N$ | 5.29      | 5.04      | 6.49               |
| $NI_3@C_2N$  | 4.15      | 4.00      | 5.70               |
